# Supplementary material for: Towards therapeutic drug monitoring of antibiotic levels – analyzing the pharmacokinetics of levofloxacin using DUV-resonance Raman spectroscopy
Source: Royal Society of Chemistry journal article supplement (doi:10.1039/d3an00402c), 2023-01-01
Supplement: d3an00402c1.pdf [file d3an00402c1.pdf]

## Supporting Information:

### Towards therapeutic drug monitoring of antibiotic level - analyzing pharmacokinetics of levofloxacin by using DUV-resonance Raman spectroscopy

Christian Domes<sup>1</sup>, Juergen Popp<sup>1,2,3</sup>, Stefan Hagel<sup>4</sup>, Mathias W. Pletz<sup>4</sup>, and Torsten Frosch<sup>1,3,5\*</sup>

<sup>1</sup> *Leibniz Institute of Photonic Technology, 07745 Jena, Germany*

<sup>2</sup> *Friedrich Schiller University, Institute of Physical Chemistry, 07743 Jena, Germany*

<sup>3</sup> *Friedrich Schiller University, Abbe Center of Photonics, 07745 Jena, Germany*

<sup>4</sup> *Institute of Infectious Diseases and Infection Control, University Hospital, 07747 Jena, Germany*

<sup>5</sup> *Biophotonics and Biomedical Engineering Group, Technical University Darmstadt, Merckstraße 25, 64283 Darmstadt, Germany*

\* [torsten.frosch@tu-darmstadt.de](mailto:torsten.frosch@tu-darmstadt.de), ORCID 0000-0003-3358-8878

## Supplementary Material

### Figure S1

Exemplary workflow of data evaluation. First, the untreated Raman spectra (A) of water (orange, 1), 20 and 50  $\mu\text{M}$  levofloxacin (2 and 3) were scatter corrected *via* the EMSC algorithm (B). Then, for quantification, the respective difference spectra were calculated using the water spectrum as a reference and the Raman signal at about  $1400\text{ cm}^{-1}$  was investigated.

### Figure S2

Alignment of the experimental FT Raman spectrum of levofloxacin (1) with the calculated scattering activities (calculation method: B3LYP/cc-pVTZ) and their Gaussian peak profile (FWHM =  $20\text{ cm}^{-1}$ , 2). The scaling factor and the resulting MAE value for the investigated wavenumber region ( $1800\text{-}200\text{ cm}^{-1}$ ) are 0.98 and 1.41, respectively.

**Figure S1**

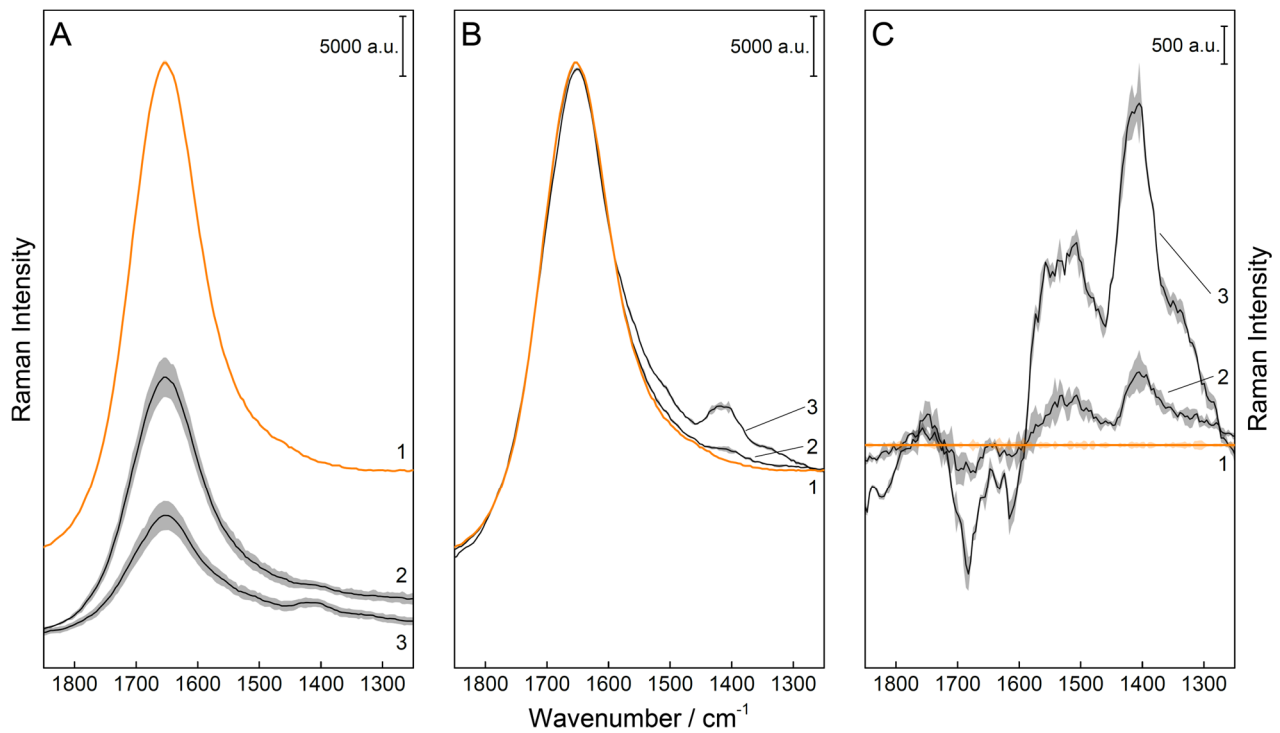

**Figure S1:** Exemplary workflow of data evaluation. First, the untreated Raman spectra (A) of water (orange, 1), 20 and 50  $\mu\text{M}$  levofloxacin (2 and 3) were scatter corrected *via* the EMSC algorithm (B). Then, for quantification, the respective difference spectra were calculated using the water spectrum as a reference and the Raman signal at about 1400  $\text{cm}^{-1}$  was investigated.

Figure S2

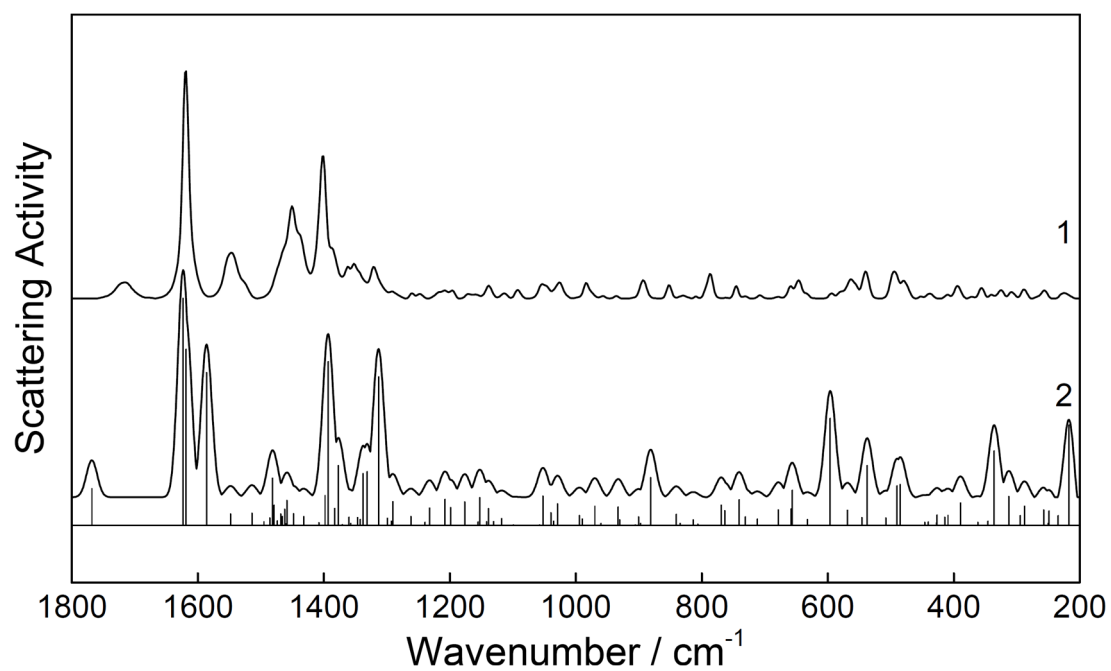

**Figure S2:** Alignment of the experimental FT Raman spectrum of levofloxacin (1) with the calculated scattering activities (calculation method: B3LYP/cc-pVTZ) and their Gaussian peak profile (FWHM = 20  $\text{cm}^{-1}$ , 2). The scaling factor and the resulting MAE value for the investigated wavenumber region (1800-200  $\text{cm}^{-1}$ ) are 0.98 and 1.41, respectively.
